# Supplementary material for: The antimicrobial peptide thanatin disrupts the bacterial outer membrane and inactivates the NDM-1 metallo-β-lactamase
Source: PubMed Central journal article supplement (PMC6684654; doi:10.1038/s41467-019-11503-3), 2019-08-06
Supplement: 41467_2019_11503_MOESM1_ESM.pdf [file 41467_2019_11503_MOESM1_ESM.pdf]

Supplementary information

**The antimicrobial peptide thanatin disrupts the bacterial outer  
membrane and inactivates the NDM-1 metallo- $\beta$ -lactamase**

Ma et al.

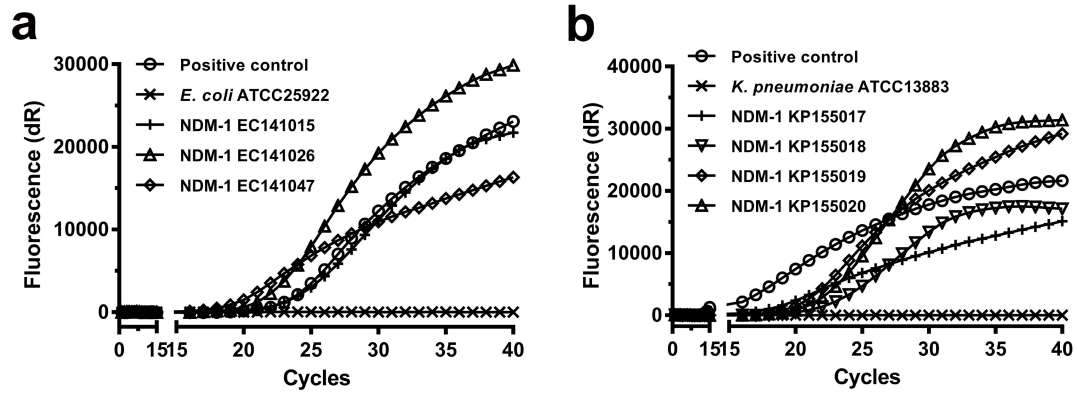

**Supplementary Figure 1. Examination of *bla*<sub>NDM-1</sub> gene expression.** The *bla*<sub>NDM-1</sub> gene was detected in clinical isolates of *E. coli* (a) and *K. pneumoniae* (b), with *E. coli* ATCC25922 and *K. pneumoniae* ATCC13883 as negative controls. Source data are provided in Source Data file.

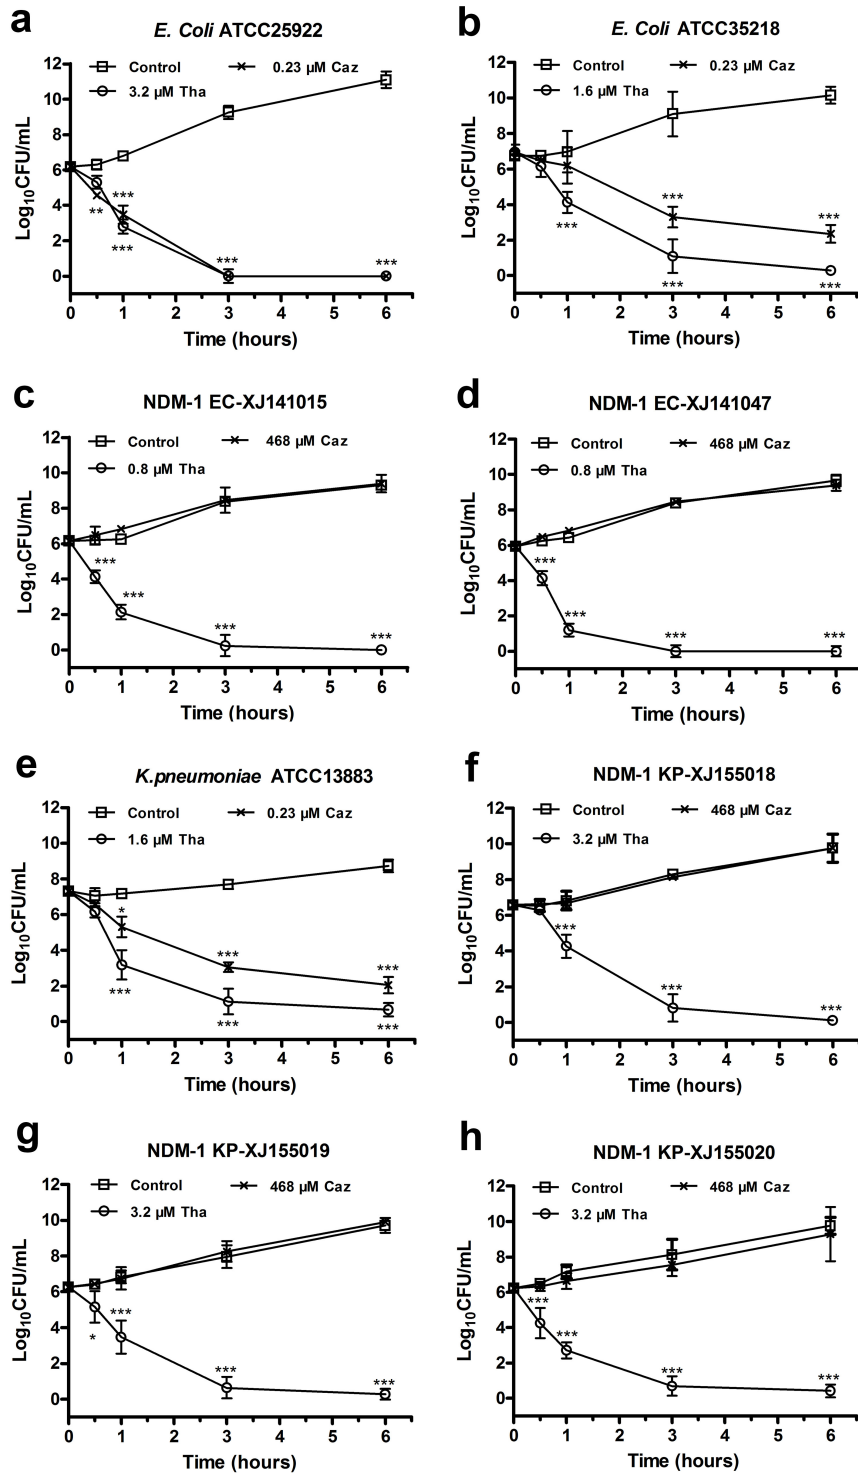

**Supplementary Figure 2. Kill curves of thanatin and ceftazidime against clinical NDM-1 strains.** NDM-1-producing *E. coli* (a-d) and *K. pneumoniae* (e-h) were treated with thanatin (Tha) and ceftazidime (Caz). Data are presented as the mean  $\pm$  s.e.m. from three independent experiments. \* $P < 0.05$ , \*\* $P < 0.01$ , \*\*\* $P < 0.001$  versus control (determined by two-way ANOVA with Bonferroni's comparison). Source data are provided in Source Data file.

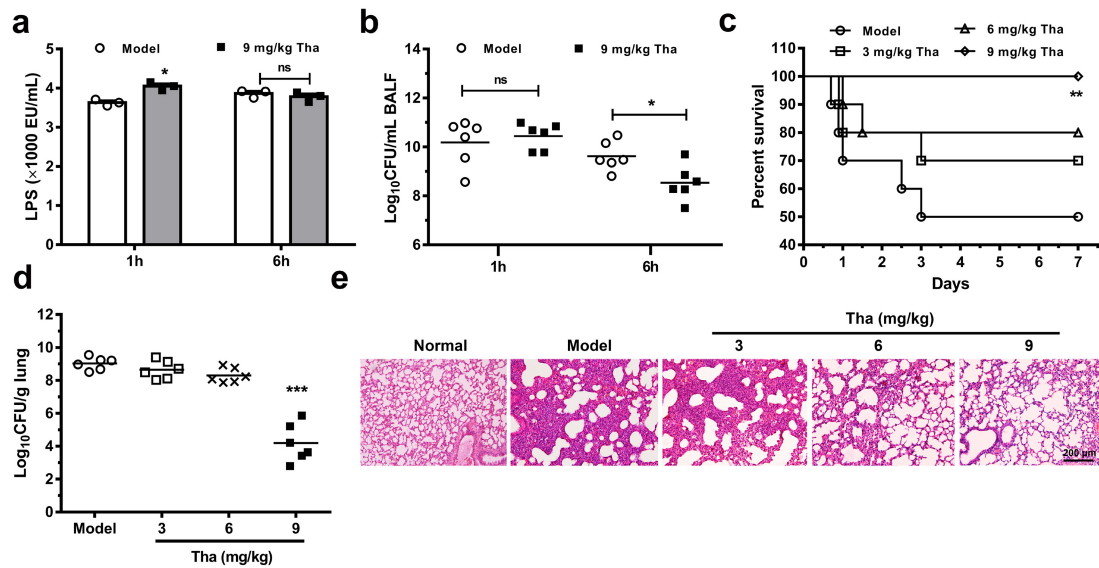

**Supplementary Figure 3. Thanatin promotes the release of Ca<sup>2+</sup> and LPS from the outer membrane of NDM-1-producing *K. pneumoniae* in vivo.** **a, b** LPS levels (**a**) and bacterial loads (**b**) in the BALF of *K. pneumoniae* XJ155017-infected mice were analyzed at 1 and 6 h after 9 mg/kg thanatin treatment (n=6 per group). **c** Survival curves for the *K. pneumoniae* XJ155017 pneumonia model. BALB/c mice were intranasally administered with a sublethal dose of *K. pneumoniae* XJ155017 and treated with three doses of thanatin via intraperitoneal injection (n=10 per group). **d** Bacterial loads in the lungs of thanatin-treated *K. pneumoniae* XJ155017-infected mice were analyzed 24 h after infection (n=6 per group). **e** Lung morphology was examined with H&E staining in the pneumonia model after thanatin treatment. Scale bar = 200  $\mu$ m. All data are shown as the mean  $\pm$  s.e.m. *P* values were determined by two-way ANOVA (**a, b**), log-rank test (**c**), or one-way ANOVA with Bonferroni's comparison test (**d**). ns means not significant; \**P* < 0.05, \*\**P* < 0.01, \*\*\**P* < 0.001 versus model. Source data are provided in Source Data file.

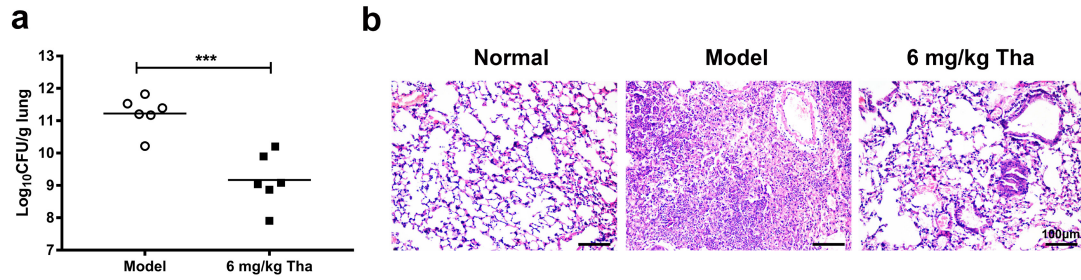

**Supplementary Figure 4. Thanatin protects NDM-1-producing *E. coli*-infected pneumonia mice.** **a** Bacterial loads in the lungs of thanatin-treated *E. coli* XJ141026-infected mice were analyzed 24 h after infection (n = 6 per group). Data are shown as the mean  $\pm$  s.e.m. **b** Lung morphology was examined with H&E staining in the pneumonia model after thanatin treatment. Scale bar = 100  $\mu$ m. *P* values were determined by two-tailed unpaired t test (**a**). \*\*\**P* < 0.001 versus model. Source data are provided in Source Data file.

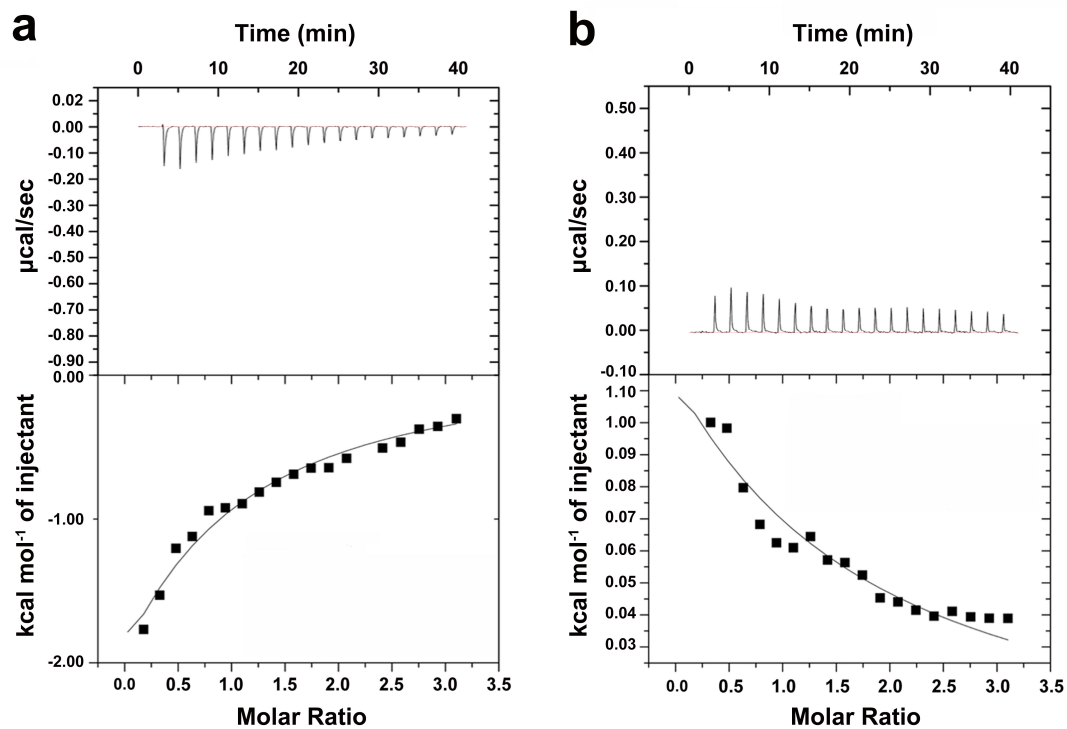

Supplementary Figure 5. ITC thermograms for the binding of LPS with  $\text{Ca}^{2+}$  (a),  $\text{Mg}^{2+}$  (b). The downward and upward peaks indicate the exothermic and endothermic process, respectively.

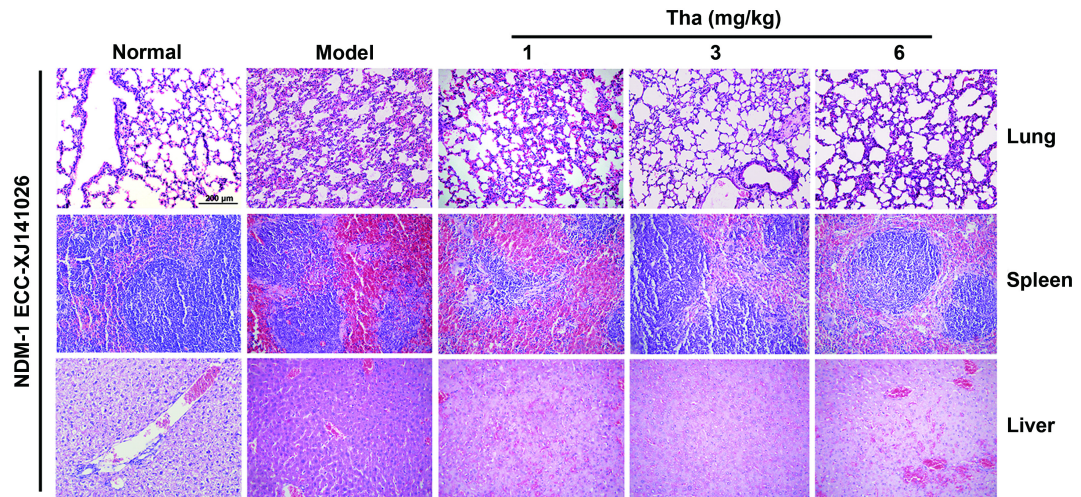

**Supplementary Figure 6. H&E staining.** Tissue morphology was examined with H&E staining in *E. coli* XJ141026 sepsis models after thanatin treatment. Scale bar = 200 μm.

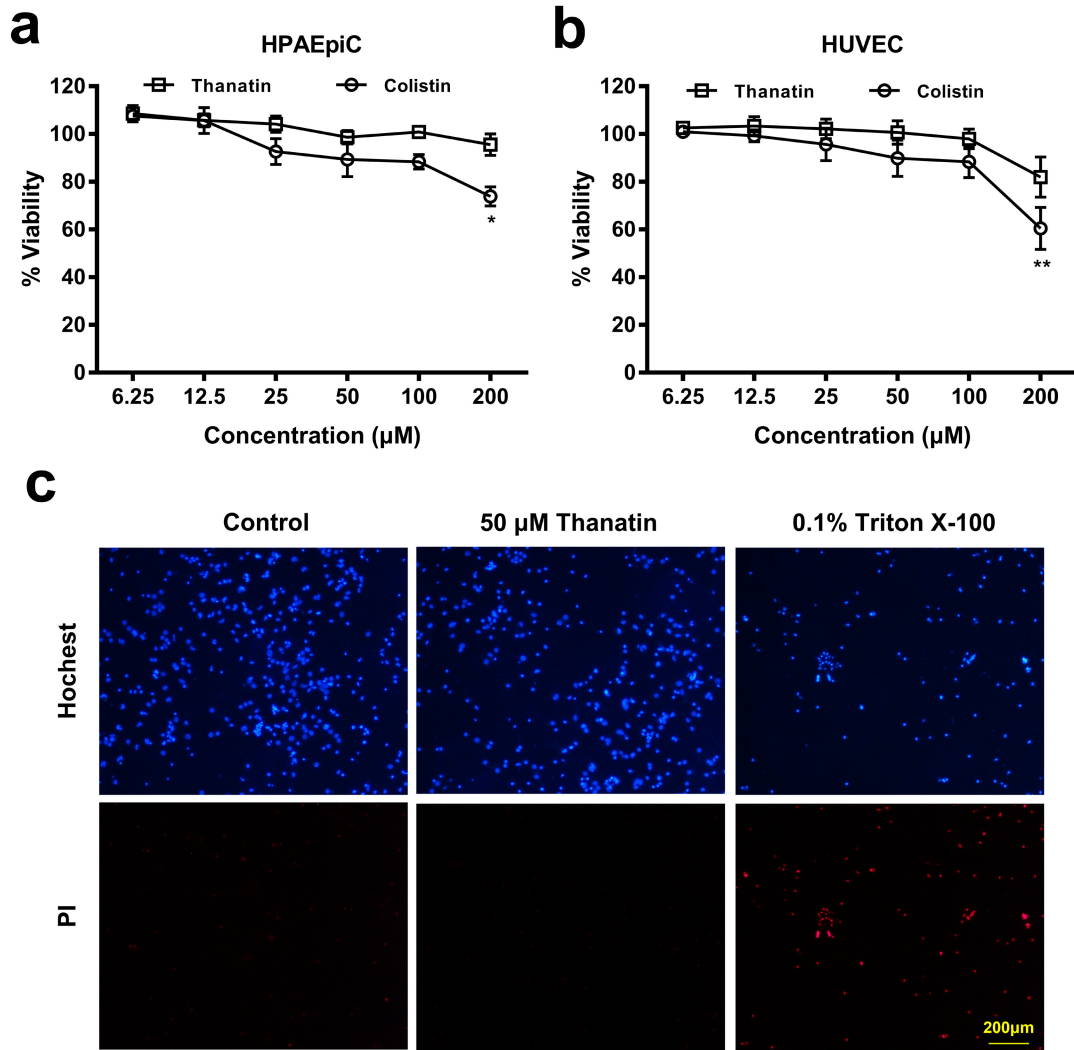

**Supplementary Figure 7. Cytotoxicity of thanatin.** **a, b** HPAEpiCs (**a**) and HUVECs (**b**) were treated with thanatin or colistin for 24 h, and cell viability was calculated on the basis of absorbance readings at 450 nm at 4 h after adding WST-8. **c** Representative photomicrographs of mouse neurons stained with Hoechst 33342 and PI fluorescent dye after exposure to 50 µM thanatin or 0.1% Triton X-100 for 24 h. Scale bar = 200 µm. Data are presented as the mean  $\pm$  s.e.m. from at least three independent experiments. \* $P < 0.05$ , \*\* $P < 0.01$  (determined by two-way ANOVA). Source data are provided in Source Data file.



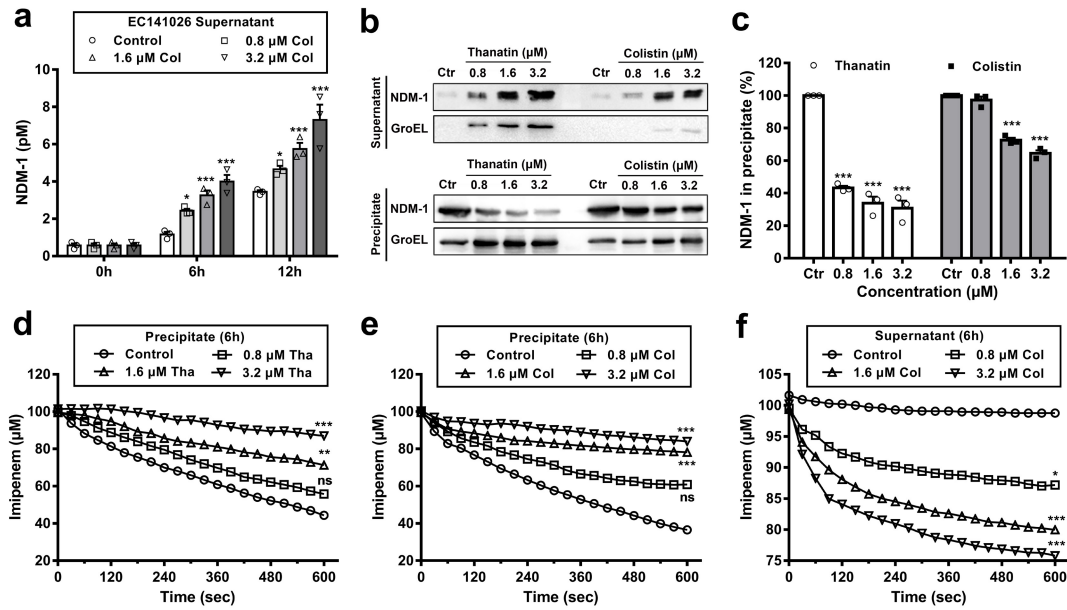

**Supplementary Figure 8. NDM-1 protein levels and its hydrolytic activity to imipenem.** **a** Increase in NDM-1 release to supernatants after treatment with colistin (Col). **b** Western blot analysis of NDM-1 in thanatin- and colistin-treated *E. coli* XJ141026 cell supernatants and precipitates for 6 h. GroEL is used as a loading control. **c** Relative expression of NDM-1 in thanatin- and colistin-treated *E. coli* XJ141026 cell precipitates for 6 h. **d** Hydrolytic effect of the cell precipitates obtained from thanatin-treated NDM-1 *E. coli* XJ141026 on imipenem. **e, f** Hydrolytic effect of the cell precipitates (**e**) and supernatants (**f**) obtained from colistin-treated NDM-1 *E. coli* XJ141026 on imipenem. The supernatants and cell precipitates were collected 6 h after incubation with thanatin or colistin. Data are presented as the mean  $\pm$  s.e.m. from three independent experiments. *P* values were determined by two-way ANOVA (**a, d–f**), or by one-way ANOVA with Bonferroni's comparison test (**c**). ns means not significant; \**P* < 0.05, \*\**P* < 0.01, \*\*\**P* < 0.001. Original western blot images for **b** are shown in **Supplementary Figure 13**. Source data are provided in Source Data file.

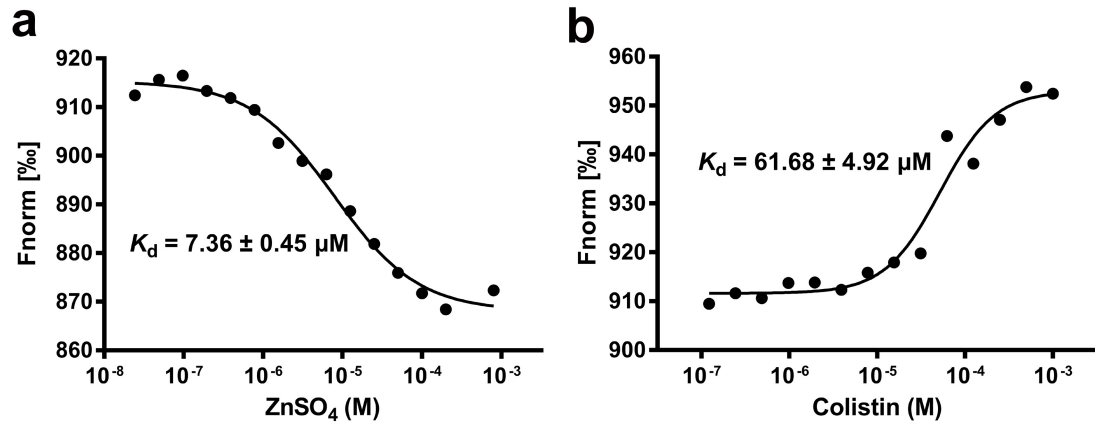

**Supplementary Figure 9. MST assay.** Interaction between RED-tris-NTA second-generation dye-labeled purified apo-NDM-1 with ZnSO<sub>4</sub> (**a**) or colistin (**b**). Data are presented as the mean  $\pm$  s.e.m. from three independent experiments. Source data are provided in Source Data file.

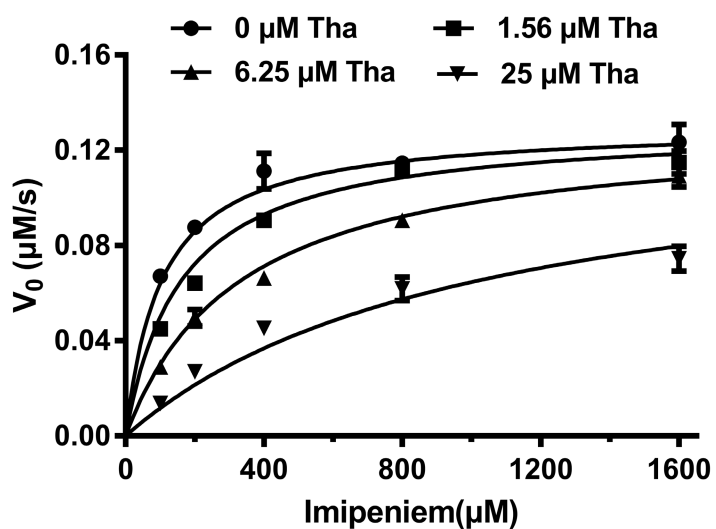

**Supplementary Figure 10. In vitro inactivation of NDM-1 by thanatin.** The initial rate of hydrolysis of imipenem (100, 200, 400, 800, and 1600 μM) by 1 nM NDM-1 was evaluated in the absence and presence of three concentrations of thanatin. The curves show the fits to the competitive inhibition model. Data are shown as the mean ± s.e.m. from three independent experiments. Source data are provided in Source Data file.

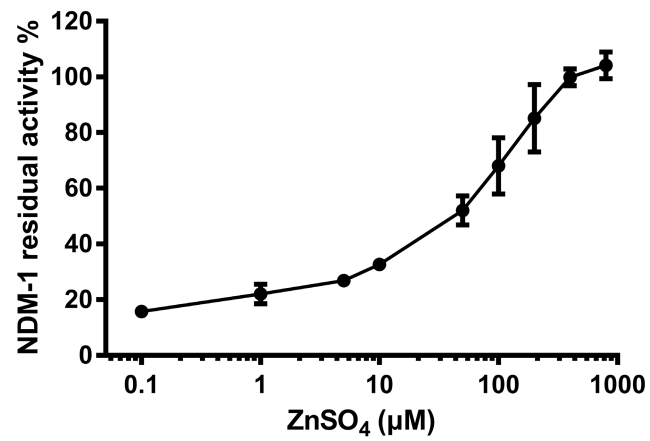

**Supplementary Figure 11. Zn<sup>2+</sup> restoration assays.** NDM-1 activity inhibited by thanatin was gradually rescued with the increasing concentrations of Zn<sup>2+</sup>. Data are shown as the mean ± s.e.m. from three independent experiments. Source data are provided in Source Data file.

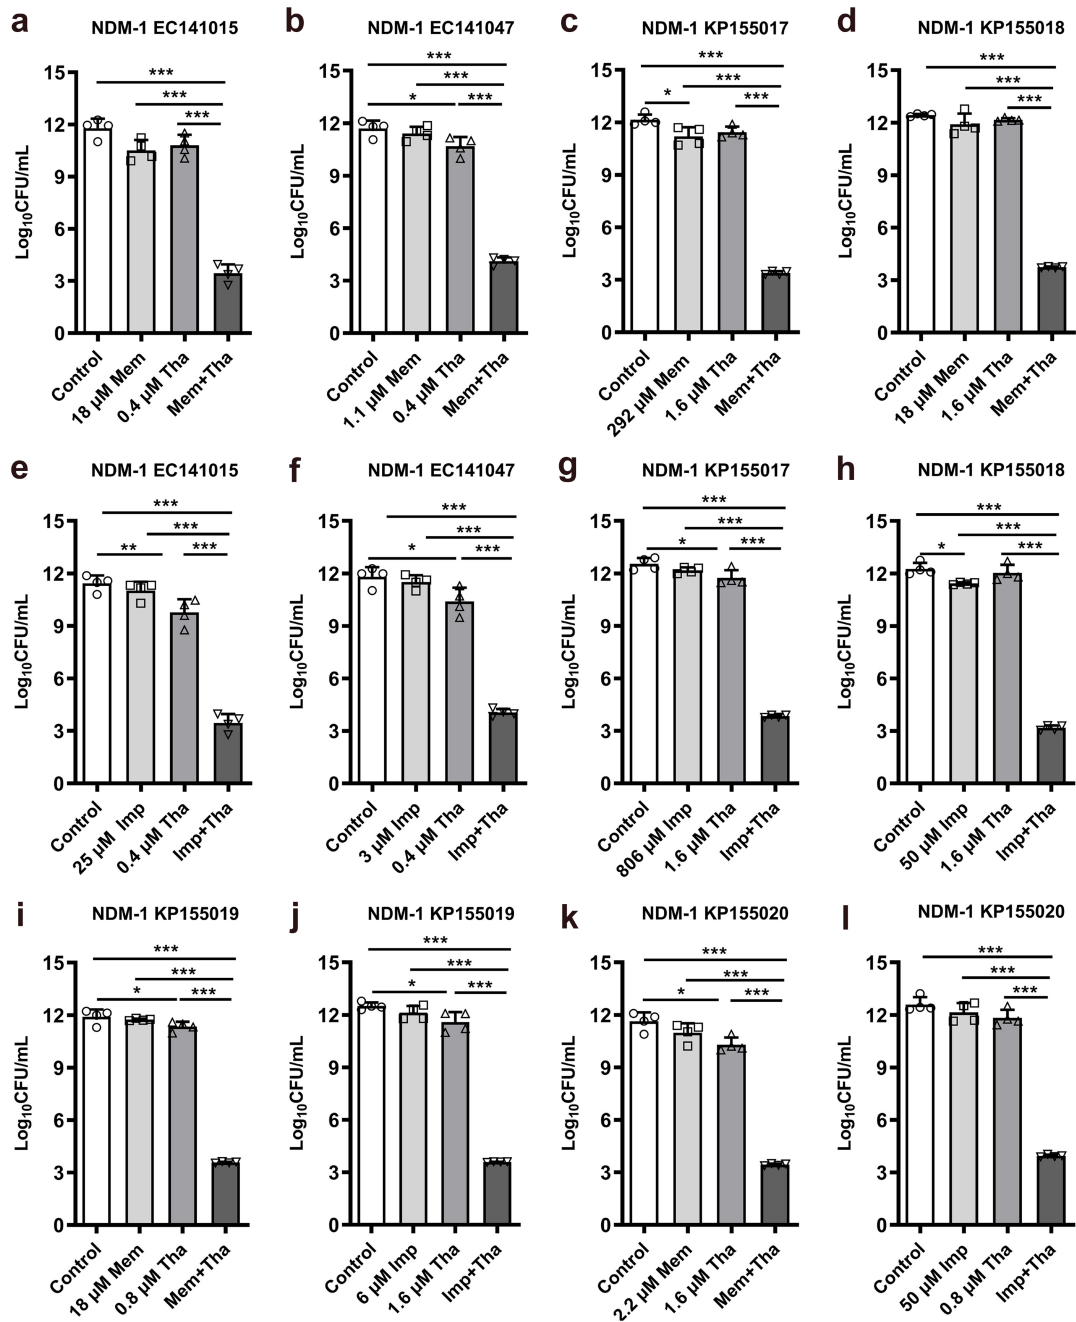

**Supplementary Figure 12. Sub-MICs of thanatin reverse carbapenem resistance in vitro.** Sub-MICs of thanatin restored the activity of meropenem (**a-d, i, k**) and imipenem (**e-h, j, l**) against NDM-1-producing *E. coli* and *K. pneumoniae*. All data are shown as the mean  $\pm$  s.e.m. from at least three independent experiments. \* $P < 0.05$ , \*\* $P < 0.01$ , \*\*\* $P < 0.001$  (determined by one-way ANOVA with Bonferroni's comparison). Source data are provided in Source Data file.

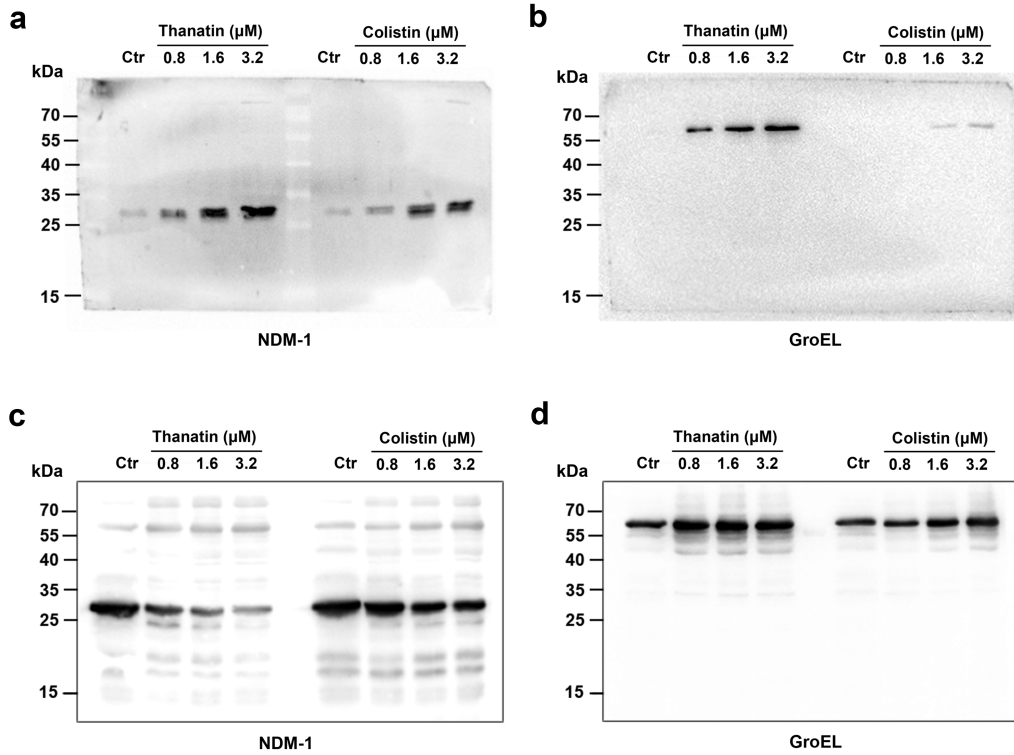

**Supplementary Figure 13. Original western blot images for Supplementary Figure 8b. a, b** Western blot analysis of NDM-1 (a) and GroEL (b) in cell supernatants of thanatin- and colistin-treated *E. coli* XJ141026. **c, d** Western blot analysis of NDM-1 (c) and GroEL (d) in cell precipitates of thanatin- and colistin-treated *E. coli* XJ141026.

**Supplementary Table 1.** Identification and antibiotic susceptibility of NDM-1-producing *E. coli* strains.

| Antibiotics                 |     | Strains        |     |                      |     |                      |     |                      |     |
|-----------------------------|-----|----------------|-----|----------------------|-----|----------------------|-----|----------------------|-----|
|                             |     | <i>E. coli</i> |     | NDM-1 <i>E. coli</i> |     | NDM-1 <i>E. coli</i> |     | NDM-1 <i>E. coli</i> |     |
|                             |     | ATCC25922      |     | XJ141015             |     | XJ141026             |     | XJ141047             |     |
| Imipenem                    | MIC | ≤1             | (S) | >8                   | (R) | >8                   | (R) | >8                   | (R) |
| Aztreonam                   | MIC | ≤2             | (S) | >16                  | (R) | >16                  | (R) | >16                  | (R) |
| Cefotaxime                  | MIC | ≤1             | (S) | >32                  | (R) | >32                  | (R) | >32                  | (R) |
| Ciprofloxacin               | MIC | ≤0.5           | (S) | >2                   | (R) | >2                   | (R) | ≤0.5                 | (S) |
| Ampicillin                  | MIC | ≤4             | (S) | >16                  | (R) | >16                  | (R) | >16                  | (R) |
| Meropenem                   | MIC | ≤1             | (S) | >8                   | (R) | >8                   | (R) | >8                   | (R) |
| Piperacillin                | MIC | ≤4             | (S) | >64                  | (R) | >64                  | (R) | >64                  | (R) |
| Tetracycline                | MIC | ≤2             | (S) | ≤2                   | (S) | >8                   | (R) | ≤2                   | (S) |
| Cefepime                    | MIC | ≤2             | (S) | >16                  | (R) | >16                  | (R) | >16                  | (R) |
| Moxifloxacin                | MIC | ≤1             | (S) | >4                   | (R) | >4                   | (R) | ≤1                   | (S) |
| Cotrimoxazole               | MIC | ≤0.5/9.5       | (S) | ≤0.5/9.5             | (S) | >2/38                | (R) | ≤0.5/9.5             | (S) |
| Aoxicillin/ clavulanic acid | MIC | 8/4            | (S) | >16/8                | (R) | >16/8                | (R) | >16/8                | (R) |
| Chloramphenicol             | MIC | ≤4             | (S) | >16                  | (R) | ≤4                   | (S) | ≤4                   | (S) |
| Gentamicin                  | MIC | ≤2             | (S) | ≤2                   | (S) | >8                   | (R) | >8                   | (R) |
| Cefazolin                   | MIC | ≤4             | (S) | >16                  | (R) | >16                  | (R) | >16                  | (R) |
| Ampicillin/ sulbactam       | MIC | ≤4/2           | (S) | >16/8                | (R) | >16/8                | (R) | >16/8                | (R) |
| Piperacillin/ tazobactam    | MIC | ≤4/2           | (S) | >64/4                | (R) | >64/4                | (R) | >64/4                | (R) |
| Amikacin                    | MIC | ≤8             | (S) | ≤8                   | (S) | ≤8                   | (S) | ≤8                   | (S) |
| Ceftazidime                 | MIC | ≤1             | (S) | >16                  | (R) | >16                  | (R) | >16                  | (R) |
| Levofloxacin                | MIC | ≤1             | (S) | >8                   | (R) | >8                   | (R) | ≤1                   | (S) |
| Cefoperazone/ sulbactam     | KB  | —              | —   | 7                    | (R) | 7                    | (R) | 7                    | (R) |
| Nitrofurantoin              | KB  | —              | —   | 14                   | (R) | 17                   | (R) | 19                   | (S) |
| Cefuroxime                  | KB  | —              | —   | 7                    | (R) | 7                    | (R) | 7                    | (R) |

R, resistant; S, sensitive; MIC, minimum inhibitory concentration; KB, Kirby Bauer disc diffusion method.

The unit of MIC is “μg/mL”. The unit of KB is “mm”.

**Supplementary Table 2.** Identification and antibiotic susceptibility of NDM-1-producing *K. pneumoniae* strains.

| Antibiotics                 |     | Strains              |     |                               |     |                               |     |                               |     |                               |     |
|-----------------------------|-----|----------------------|-----|-------------------------------|-----|-------------------------------|-----|-------------------------------|-----|-------------------------------|-----|
|                             |     | <i>K. pneumoniae</i> |     | NDM-1<br><i>K. pneumoniae</i> |     | NDM-1<br><i>K. pneumoniae</i> |     | NDM-1<br><i>K. pneumoniae</i> |     | NDM-1<br><i>K. pneumoniae</i> |     |
|                             |     | ATCC13883            |     | XJ155017                      |     | XJ155018                      |     | XJ155019                      |     | XJ155020                      |     |
| Imipenem                    | MIC | <=1                  | (S) | >8                            | (R) | >8                            | (R) | >8                            | (R) | >8                            | (R) |
| Aztreonam                   | MIC | <=2                  | (S) | >16                           | (R) | >16                           | (R) | >16                           | (R) | >16                           | (R) |
| Cefotaxime                  | MIC | <=1                  | (S) | >32                           | (R) | >32                           | (R) | >32                           | (R) | >32                           | (R) |
| Ciprofloxacin               | MIC | <=0.5                | (S) | >2                            | (R) | >2                            | (R) | >2                            | (R) | >2                            | (R) |
| Ampicillin                  | MIC | 16                   | (R) | >16                           | (R) | >16                           | (R) | >16                           | (R) | >16                           | (R) |
| Meropenem                   | MIC | <=1                  | (S) | >8                            | (R) | >8                            | (R) | >8                            | (R) | >8                            | (R) |
| Piperacillin                | MIC | 8                    | (S) | >64                           | (R) | >64                           | (R) | >64                           | (R) | >64                           | (R) |
| Tetracycline                | MIC | <=2                  | (S) | 4                             | (S) | >8                            | (R) | >8                            | (R) | >8                            | (R) |
| Cefepime                    | MIC | <=2                  | (S) | >16                           | (R) | >16                           | (R) | >16                           | (R) | >16                           | (R) |
| Moxifloxacin                | MIC | <=1                  | (S) | >4                            | (R) | >4                            | (R) | >4                            | (R) | >4                            | (R) |
| Cotrimoxazole               | MIC | =0.5/9.5             | (S) | >1/19                         | (S) | >2/38                         | (R) | >2/38                         | (R) | >2/38                         | (R) |
| Aoxicillin/ clavulanic acid | MIC | <=4/2                | (S) | >16/8                         | (R) | >16/8                         | (R) | >16/8                         | (R) | >16/8                         | (R) |
| Chloramphenicol             | MIC | <=4                  | (S) | >16                           | (R) | >16                           | (R) | >16                           | (R) | >16                           | (R) |
| Gentamicin                  | MIC | <=2                  | (S) | <=2                           | (S) | <=2                           | (S) | <=2                           | (S) | <=2                           | (S) |
| Cefazolin                   | MIC | <=4                  | (S) | >16                           | (R) | >16                           | (R) | >16                           | (R) | >16                           | (R) |
| Ampicillin/ sulbactam       | MIC | 8/4                  | (S) | >16/8                         | (R) | >16/8                         | (R) | >16/8                         | (R) | >16/8                         | (R) |
| Piperacillin/ tazobactam    | MIC | <=4/4                | (S) | >64/4                         | (R) | >64/4                         | (R) | >64/4                         | (R) | >64/4                         | (R) |
| Amikacin                    | MIC | <=8                  | (S) | <=8                           | (S) | <=8                           | (S) | <=8                           | (S) | <=8                           | (S) |
| Ceftazidime                 | MIC | <=1                  | (S) | >16                           | (R) | >16                           | (R) | >16                           | (R) | >16                           | (R) |
| Levofloxacin                | MIC | <=1                  | (S) | ---                           | -   | ---                           | -   | >8                            | (R) | >8                            | (R) |
| Cefoperazone/ sulbactam     | KB  | 32                   | (S) | 7                             | (R) | 7                             | (R) | 7                             | (R) | 7                             | (R) |
| Nitrofurantoin              | KB  | 21                   | (S) | 7                             | (R) | 9                             | (R) | 10                            | (R) | 9                             | (R) |
| Cefuroxime                  | KB  | 23                   | (S) | 7                             | (R) | 7                             | (R) | 7                             | (R) | 7                             | (R) |

R, resistant; S, sensitive; MIC, minimum inhibitory concentration; KB, Kirby Bauer disc diffusion method.

The unit of MIC is “µg/mL”. The unit of KB is “mm”.



**Supplementary Table 3.** Thermodynamic parameters for the binding of LPS with thanatin,  $\text{Ca}^{2+}$ , and  $\text{Mg}^{2+}$  were estimated by ITC.

|                                          | $K_d$ ( $\mu\text{M}$ ) | $\Delta H$ (Cal/mol) | $\Delta S$ (Cal/mol/deg) |
|------------------------------------------|-------------------------|----------------------|--------------------------|
| <b>Thanatin + LPS</b>                    | $1.09 \pm 0.11$         | $-6.46 \times 10^3$  | 5.62                     |
| <b><math>\text{Ca}^{2+}</math> + LPS</b> | $114.24 \pm 26.05$      | $-9.42 \times 10^4$  | $-2.98 \times 10^2$      |
| <b><math>\text{Mg}^{2+}</math> + LPS</b> | $208.46 \pm 52.28$      | $2.83 \times 10^6$   | $9.50 \times 10^3$       |

**Supplementary Table 4.** Kinetic parameters for imipenem hydrolysis catalyzed by NDM-1.

| Kinetic parameters                                   | Enzyme/substrate   |
|------------------------------------------------------|--------------------|
|                                                      | NDM-1/Imipenem     |
| $K_m$ ( $\mu\text{M}$ )                              | 103.80 $\pm$ 10.34 |
| $V_{\text{max}}$ ( $\mu\text{M}\cdot\text{s}^{-1}$ ) | 0.13 $\pm$ 0.03    |
| $K_{\text{cat}}$ ( $\text{s}^{-1}$ )                 | 130.40 $\pm$ 2.67  |
